# Supplementary material for: Dual-duty NiCo2S4 nanosheet-based solar rechargeable batteries toward multi-scene solar energy conversion and storage
Source: Royal Society of Chemistry journal article supplement (doi:10.1039/d3nr01483e), 2023-01-01
Supplement: d3nr01483e1.pdf [file d3nr01483e1.pdf]

## Supporting Information

### Dual-duty NiCo<sub>2</sub>S<sub>4</sub> Nanosheets Based Solar Rechargeable Batteries toward Multi-scene Solar Energy Conversion and Storage

Xiaohong Ma <sup>a</sup>, Jie Fu <sup>a</sup>, Linning Gao <sup>a</sup>, Junzheng Zhang <sup>a</sup>, Sheng Tao <sup>a</sup>, Wenqing Guo <sup>a</sup>, Xuefei Liu <sup>a</sup>, Beibei Yang <sup>a</sup>, Jun Lu <sup>\*ab</sup>

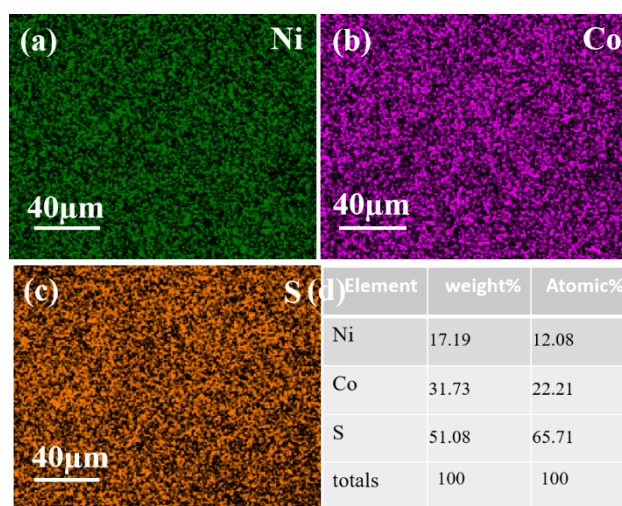

**Figure S1.** (a-c) Elemental mappings of NiCo<sub>2</sub>S<sub>4</sub> nanosheets showing the distribution of Ni, Co and S. (d) EDS of the NiCo<sub>2</sub>S<sub>4</sub>.

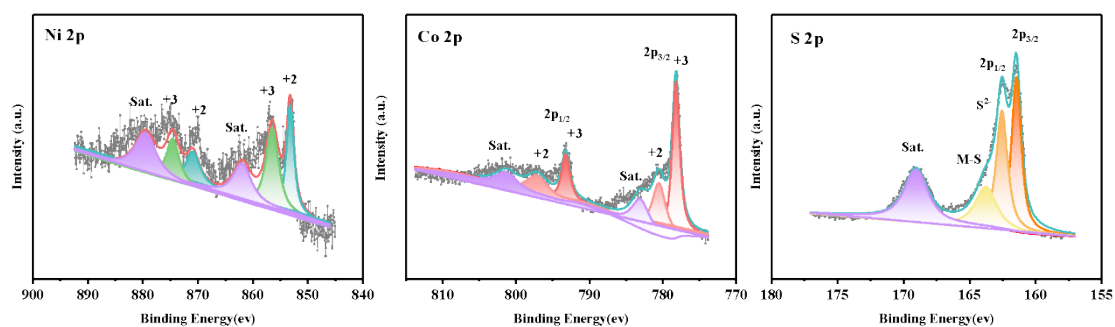

**Figure S2.** XPS spectra of the Ni 2p, Co 2p, and S 2p, respectively.

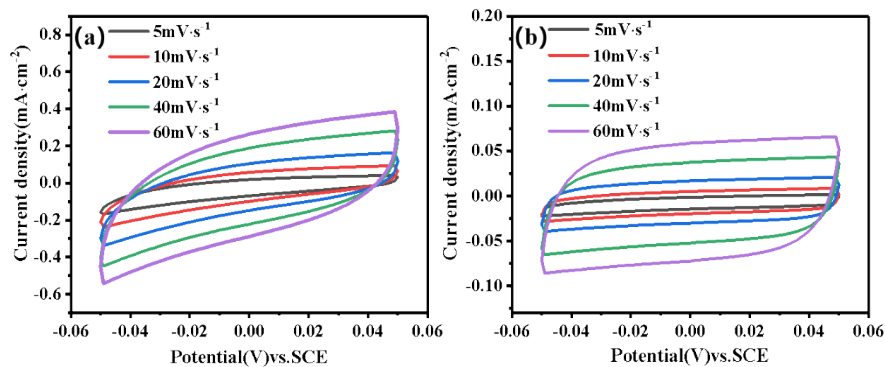

**Figure S3.** ECSA measurements (a, b) CV curves of NiCo<sub>2</sub>S<sub>4</sub> nanosheets electrode and CP electrode in 1 M NaCl under different scan rates within non-Faradaic region.

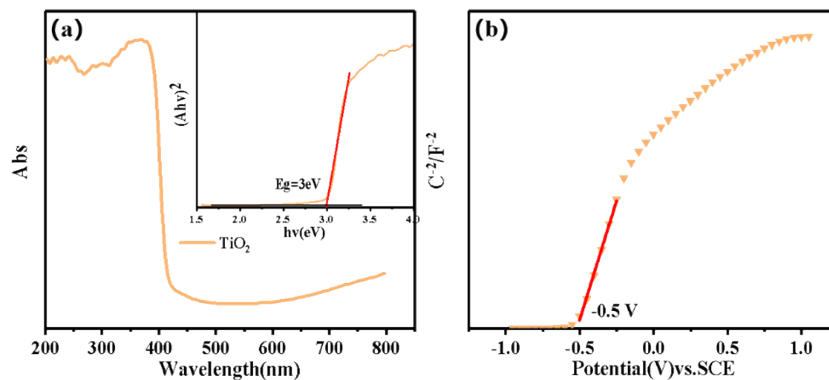

**Figure S4.** (a) UV-vis diffuse reflectance spectrum of TiO<sub>2</sub>, (b) MS of TiO<sub>2</sub> in 0.5 M Na<sub>2</sub>SO<sub>4</sub>

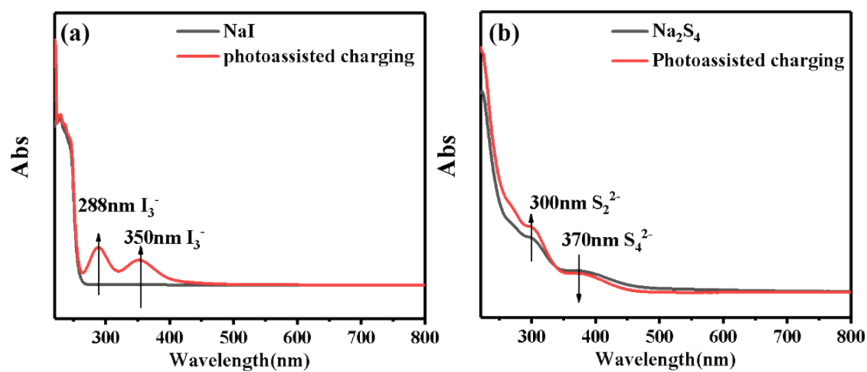

**Figure S5.** UV-vis diffuse reflectance spectrum after photo-assisted charging an hour

at  $0.01 \text{ mA cm}^{-2}$

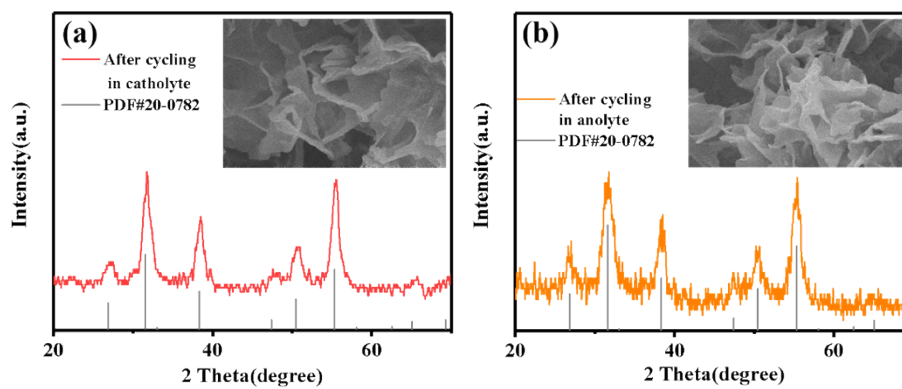

**Figure S6.** XRD and SEM of  $\text{NiCo}_2\text{S}_4$  nanosheets electrodes after cycling test.

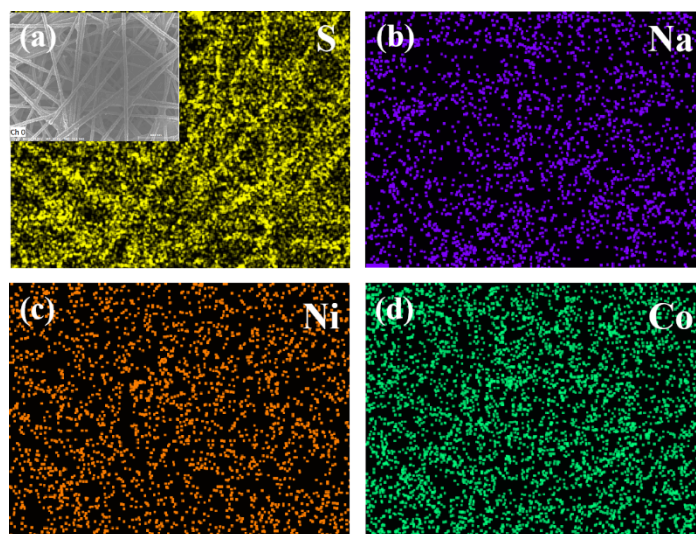

**Figure S7.** Elemental mappings of  $\text{NiCo}_2\text{S}_4$  nanosheets after 1.5 h charging at  $0.2 \text{ mA}$

$\text{cm}^{-2}$ .

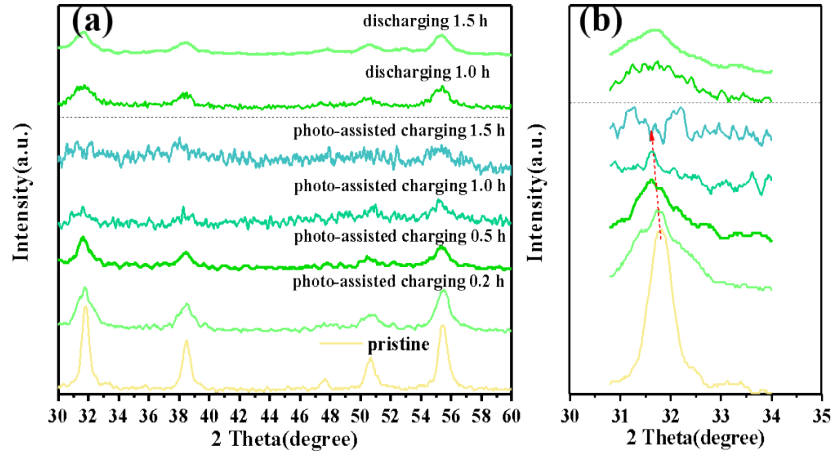

**Figure S8.** (a) Ex-situ XRD patterns at different photo-assisted charge and discharge states, (b) The  $\text{NiCo}_2\text{S}_4$  structural evolution concentrating on the enlarged region of (a) of (311) crystal plane.

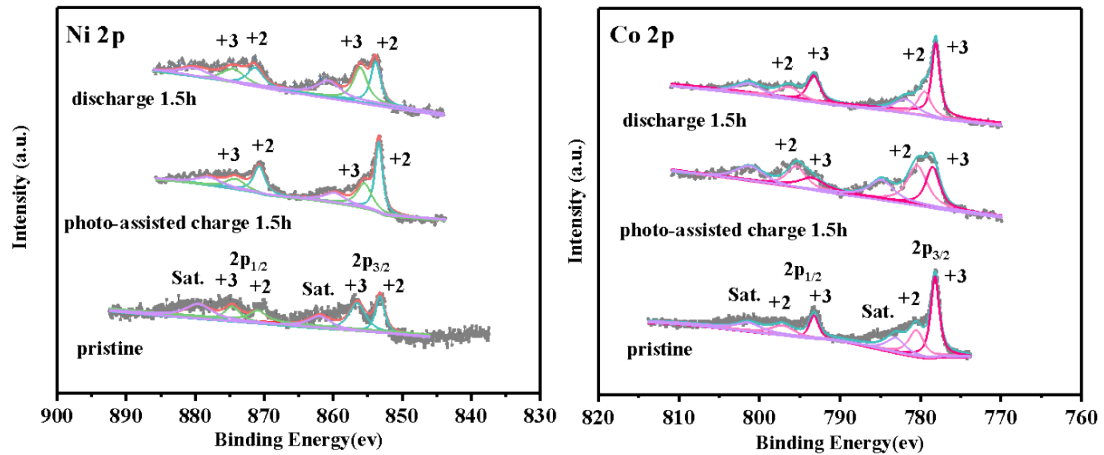

**Figure S9.** XPS spectra of Ni 2p, Co 2p at pristine, photo-assisted charge and discharge states of  $\text{NiCo}_2\text{S}_4$  nanosheets electrode.

Table 1. Current density obtained from **Figure 2c** different electrolytes at  $-0.66$  V.

| Electrolyte                | $\text{NiCo}_2\text{S}_4$ | CP        |
|----------------------------|---------------------------|-----------|
| 1M NaCl                    | -0.00142                  | -6.682E-5 |
| 1M $\text{Na}_2\text{S}_4$ | -0.01046                  | -2.586E-4 |

Table 2. EDS of the NiCo<sub>2</sub>S<sub>4</sub> after the 1<sup>st</sup> charge and 1<sup>st</sup> discharge.

|               | Element | weight% | Atomic% |
|---------------|---------|---------|---------|
| 1st charge    | S       | 47.72   | 58.99   |
|               | Ni      | 15.15   | 10.24   |
|               | Co      | 31.62   | 21.27   |
|               | Na      | 5.51    | 9.5     |
| 1st discharge | S       | 34.29   | 48.87   |
|               | Ni      | 20.96   | 16.32   |
|               | Co      | 44.67   | 34.65   |
|               | Na      | 0.08    | 0.16    |
